# Supplementary material for: EsoDetect: computational validation and algorithm development of a novel diagnostic and prognostic tool for dysplasia in Barrett’s esophagus
Source: PeerJ. 2025 Jul 3;13:e19613. doi: 10.7717/peerj.19613 (PMC12229151; doi:10.7717/peerj.19613)
Supplement: Supplemental Information 11 [file peerj-13-19613-s011.xlsx]

## Sheet: Sheet1
Selected for training	Symbol	Comparison	Ensembl Gene ID	logFC_HGDBEvsNDBE	logCPM_HGDBEvsNDBE	F_HGDBEvsNDBE	PValue_HGDBEvsNDBE	FDR_HGDBEvsNDBE	logFC_LGDBEvsNDBE	logCPM_LGDBEvsNDBE	F_LGDBEvsNDBE	PValue_LGDBEvsNDBE	FDR_LGDBEvsNDBE	logFC_HGDBEvsLGDBE	logCPM_HGDBEvsLGDBE	F_HGDBEvsLGDBE	PValue_HGDBEvsLGDBE	FDR_HGDBEvsLGDBE
yes	CDH1	Literature	ENSG00000039068	-0.00984645	9.38195	0.00332605	0.954142	0.98576	0.204	9.38195	1.77762	0.185924	0.783509	-0.213847	9.38195	3.18411	0.0778452	0.241529		Symbol: The shorthand name for the gene.
yes	PGC	FigS1A	ENSG00000096088	-3.32804	10.4089	10.9844	0.0013468	0.0828505	-4.8393	10.4089	23.7278	5.01398e-06	0.0143904	1.51126	10.4089	5.48533	0.0214906	0.106045		Comparison: Features identified in different analysis approaches, explained in FigureS1 and FigureS2.
yes	PLLP	FigS1A	ENSG00000102934	-1.97316	8.38993	20.7686	1.68734e-05	0.011217	-1.97162	8.38993	22.5356	8.07828e-06	0.0151343	-0.0015435	8.38993	3.78276e-05	0.995107	0.997784		Ensembl Gene ID: A unique identifier for the gene in the Ensembl database.
yes	NR4A1	FigS1B	ENSG00000123358	2.50225	6.82605	17.2395	7.73001e-05	0.0215944	1.62453	6.82605	9.42552	0.00286325	0.298672	0.877725	6.82605	4.3876	0.0391424	0.155214		logFC_HGDBEvsNDBE: Log2 fold change in gene expression between HGDBE and NDBE.
yes	FOSB	FigS1A	ENSG00000125740	4.20683	6.49661	28.7179	6.93107e-07	0.00178544	3.30273	6.49661	20.3332	2.04676e-05	0.0263622	0.904108	6.49661	2.80482	0.0976191	0.277557		logCPM_HGDBEvsNDBE: Log2 counts per million, used to normalize expression levels between HGDBE and NDBE.
yes	SLC38A4	FigS1B	ENSG00000139209	2.76952	1.79846	18.4845	4.46343e-05	0.0161909	1.74555	1.79846	10.1062	0.00204844	0.270604	1.02397	1.79846	7.11769	0.00910582	0.0616063		F_HGDBEvsNDBE: F-statistic that indicates the variance between HGDBE and NDBE.
yes	TP53	Literature	ENSG00000141510	0.135836	5.45707	0.834438	0.363518	0.712212	0.215276	5.45707	2.84989	0.0949635	0.685496	-0.07944	5.45707	0.608832	0.437347	0.666877		PValue_HGDBEvsNDBE: P-value indicating the significance of the expression difference between HGDBE and NDBE.
yes	CELA3A	FigS1B	ENSG00000142789	-4.89667	1.99287	18.6215	4.22994e-05	0.0161909	-3.66073	1.99287	9.99701	0.00216411	0.276711	-1.23594	1.99287	3.05233	0.0841796	0.253289		FDR_HGDBEvsNDBE: Adjusted p-value (FDR) accounting for multiple comparisons between HGDBE and NDBE.
yes	ATF3	FigS1B	ENSG00000162772	2.19579	6.02922	13.5459	0.000405312	0.0469251	1.56836	6.02922	8.35927	0.00485743	0.35985	0.627429	6.02922	2.34377	0.129454	0.330785		logFC_LGDBEvsNDBE: Log2 fold change in gene expression between LGDBE and NDBE.
yes	TMPRSS5	FigS1B	ENSG00000166682	2.3654	1.05195	22.1168	9.57357e-06	0.00730711	1.09469	1.05195	6.96644	0.0098419	0.395468	1.27071	1.05195	15.2971	0.000181695	0.00537983		logCPM_LGDBEvsNDBE: Log2 counts per million, normalizing expression levels between LGDBE and NDBE.
yes	SFTPB	FigS1A	ENSG00000168878	-2.27264	2.49448	10.5198	0.00167789	0.0891184	-2.76323	2.49448	20.1604	2.18197e-05	0.0264506	0.490589	2.49448	1.28173	0.260699	0.498606		F_LGDBEvsNDBE: F-statistic for the comparison between LGDBE and NDBE.
yes	EGR3	FigS1B	ENSG00000179388	3.68255	3.597	33.9984	9.36042e-08	0.000482249	1.54018	3.597	7.91216	0.00607914	0.386664	2.14238	3.597	25.777	2.18306e-06	0.00047592		PValue_LGDBEvsNDBE: P-value indicating the significance of the expression difference between LGDBE and NDBE.
yes	GKN2	FigS2	ENSG00000183607	-3.57018	8.85442	7.62827	0.00702654	0.15213	-2.65505	8.85442	3.5459	0.0630778	0.635864	-0.915136	8.85442	0.75351	0.387786	0.624332		FDR_LGDBEvsNDBE: Adjusted p-value (FDR) for multiple comparisons between LGDBE and NDBE.
yes	PNLIPRP1	FigS1A	ENSG00000187021	-4.61792	1.19367	39.4311	1.30219e-08	0.000134177	-3.98122	1.19367	28.9083	6.31637e-07	0.00349329	-0.636699	1.19367	1.91498	0.169958	0.388518		logFC_HGDBEvsLGDBE: Log2 fold change in gene expression between HGDBE and LGDBE.
yes	IGHV4-31	FigS1B	ENSG00000231475	-3.41658	3.50852	14.5343	0.000258085	0.0356955	-2.38877	3.50852	10.0808	0.00207974	0.270906	-1.0278	3.50852	3.09519	0.0820794	0.249372		logCPM_HGDBEvsLGDBE: Log2 counts per million, normalizing expression levels between HGDBE and LGDBE.
yes	IGHV3-43	FigS2	ENSG00000232216	-2.59167	3.45033	11.6999	0.000957615	0.072336	-2.83202	3.45033	16.4173	0.00011092	0.0843346	0.240343	3.45033	0.257231	0.613325	0.798544		F_HGDBEvsLGDBE: F-statistic that indicates the variance between HGDBE and LGDBE.
yes	IFI27	FigS2	ENSG00000275214	-1.30229	6.39013	13.8549	0.00035043	0.0422457	-1.16692	6.39013	12.5766	0.000632899	0.183961	-0.135365	6.39013	0.338521	0.562195	0.763536		PValue_HGDBEvsLGDBE: P-value indicating the significance of the expression difference between HGDBE and LGDBE.
yes	IGHV3-53	FigS2	ENSG00000282593	-1.51162	2.6114	5.00214	0.0278835	0.268015	-2.04002	2.6114	10.7786	0.00148167	0.233209	0.528403	2.6114	1.77212	0.186612	0.409771		FDR_HGDBEvsLGDBE: Adjusted p-value (FDR) for multiple comparisons between HGDBE and LGDBE.
no	SLC5A5	FigS2	ENSG00000105641	-2.50637	6.15881	6.97075	0.00984001	0.178193	-1.71	6.15881	3.05188	0.0842185	0.671722	-0.796374	6.15881	1.24016	0.268548	0.507216
no	HSD17B8	FigS1A	ENSG00000112474	-1.59644	-1.14902	9.73663	0.00245122	0.102464	-2.32048	-1.14902	22.8803	6.98294e-06	0.0143904	0.724043	-1.14902	5.80166	0.0181221	0.0952501
no	NPY	FigS1B	ENSG00000122585	-3.26434	-1.80076	24.7031	3.32141e-06	0.0052652	-1.7763	-1.80076	8.43424	0.00466716	0.358813	-1.48804	-1.80076	11.9298	0.000855866	0.0137045
no	ANGPTL6	FigS1B	ENSG00000130812	-2.06695	0.691354	26.631	1.53656e-06	0.00351839	-0.861846	0.691354	5.43176	0.0220883	0.499112	-1.2051	0.691354	19.4694	2.91906e-05	0.001895
no	CELA2A	FigS1A	ENSG00000142615	-5.6543	1.8184	45.2773	1.75344e-09	3.61349e-05	-5.66414	1.8184	43.6875	2.99854e-09	6.17938e-05	0.00983973	1.8184	0.00116659	0.972832	0.987911
no	TFF2	FigS1B	ENSG00000160181	-2.25353	9.28348	14.9862	0.000210144	0.0331402	-1.28231	9.28348	5.20973	0.0249231	0.516594	-0.971223	9.28348	5.11629	0.0262182	0.120228
no	CTRC	FigS1B	ENSG00000162438	-3.31503	1.07491	18.4641	4.50567e-05	0.0161909	-3.04685	1.07491	16.2614	0.000118258	0.0843346	-0.268175	1.07491	0.300196	0.585166	0.780079
no	GKN1	FigS2	ENSG00000169605	-4.03559	10.8282	6.95008	0.00994556	0.179347	-2.85841	10.8282	2.7768	0.0992824	0.69171	-1.17718	10.8282	0.898203	0.345923	0.587228
no	CEL	FigS1A	ENSG00000170835	-4.80214	4.6695	34.7164	7.24987e-08	0.000482249	-4.00538	4.6695	28.7697	6.78046e-07	0.00349329	-0.796762	4.6695	2.56752	0.112747	0.303882
no	PLA2G1B	FigS1B	ENSG00000170890	-5.30176	1.442	23.9591	4.52674e-06	0.00607604	-4.01011	1.442	13.0974	0.000497359	0.165339	-1.29166	1.442	3.28795	0.0732615	0.23287
no	DAB1	FigS2	ENSG00000173406	-1.94502	1.88127	5.02036	0.0276162	0.267045	-2.58714	1.88127	8.71543	0.00406234	0.340311	0.642121	1.88127	1.21157	0.27408	0.51357
no	KBTBD11	FigS2	ENSG00000176595	-3.40346	0.551458	9.56352	0.00267231	0.106199	-3.08431	0.551458	7.39221	0.00791567	0.391668	-0.319148	0.551458	0.204981	0.651864	0.82295
no	MAP7D2	FigS2	ENSG00000184368	-1.91826	1.50975	4.856	0.0302064	0.276582	-2.90442	1.50975	11.1864	0.00121985	0.218605	0.986163	1.50975	3.05807	0.0838842	0.252872
no	PRSS1	FigS1B	ENSG00000204983	-3.83275	3.59205	17.4569	7.02511e-05	0.0206819	-3.56324	3.59205	17.1516	8.02979e-05	0.0636454	-0.269505	3.59205	0.260457	0.611113	0.796623
no	IGHV3-53	FigS2	ENSG00000211967	-1.51162	2.6114	5.00214	0.0278835	0.268015	-2.04002	2.6114	10.7786	0.00148167	0.233209	0.528403	2.6114	1.77212	0.186612	0.409771
no	RPS3AP20	FigS1A	ENSG00000213757	1.74134	0.722695	18.9849	3.59271e-05	0.0161909	1.85914	0.722695	30.5249	3.38476e-07	0.00348766	-0.117802	0.722695	0.195846	0.659193	0.827433
no	HSD17B8	FigS1A	ENSG00000225312	-1.59644	-1.14902	9.73663	0.00245122	0.102464	-2.32048	-1.14902	22.8803	6.98294e-06	0.0143904	0.724043	-1.14902	5.80166	0.0181221	0.0952501
no	UQCRFS1P1	FigS1B	ENSG00000226085	-2.14049	-0.148167	16.4528	0.000108466	0.0256901	-1.99646	-0.148167	16.1512	0.000124005	0.0843346	-0.144026	-0.148167	0.168313	0.682624	0.841877
no	HSD17B8	FigS1A	ENSG00000228357	-1.59644	-1.14902	9.73663	0.00245122	0.102464	-2.32048	-1.14902	22.8803	6.98294e-06	0.0143904	0.724043	-1.14902	5.80166	0.0181221	0.0952501
no	HSD17B8	FigS1A	ENSG00000228712	-1.59644	-1.14902	9.73663	0.00245122	0.102464	-2.32048	-1.14902	22.8803	6.98294e-06	0.0143904	0.724043	-1.14902	5.80166	0.0181221	0.0952501
no	ORM1	FigS1B	ENSG00000229314	-5.0243	1.92768	19.6484	2.72975e-05	0.0149561	-3.40546	1.92768	8.53112	0.00445661	0.351885	-1.61884	1.92768	3.8976	0.0515609	0.186424
no	HSD17B8	FigS1A	ENSG00000232357	-1.59644	-1.14902	9.73663	0.00245122	0.102464	-2.32048	-1.14902	22.8803	6.98294e-06	0.0143904	0.724043	-1.14902	5.80166	0.0181221	0.0952501
no	CDSN	FigS1A	ENSG00000237165	6.38955	-1.8307	12.6246	0.000651138	0.0584548	7.34991	-1.8307	20.8178	1.85947e-05	0.0255466	-0.960359	-1.8307	1.78435	0.185516	0.408322
no	IGKV1-9	FigS2	ENSG00000241755	-1.3847	4.62031	7.52268	0.00740969	0.156134	-1.41375	4.62031	9.00314	0.00352399	0.318776	0.0290519	4.62031	0.00737894	0.931745	0.969963
no	IGHV3OR16-12	FigS1B	ENSG00000270467	-2.89889	-0.550503	13.7323	0.000370278	0.0438209	-2.38452	-0.550503	9.39257	0.00290265	0.298672	-0.514374	-0.550503	0.915903	0.34121	0.583056
no	LENG8	FigS2	ENSG00000276458	-1.93406	4.81152	7.82698	0.00635071	0.14597	-2.27641	4.81152	12.3186	0.000716242	0.189235	0.342351	4.81152	0.639793	0.425989	0.657638
no	IGKV1-9	FigS2	ENSG00000282758	-1.3847	4.62031	7.52268	0.00740969	0.156134	-1.41375	4.62031	9.00314	0.00352399	0.318776	0.0290519	4.62031	0.00737894	0.931745	0.969963
